# Supplementary material for: Vapor and healing treatment for CH3NH3PbI3−xClx films toward large-area perovskite solar cells
Source: Royal Society of Chemistry journal article supplement (doi:10.1039/c5nr08658b), 2016-01-01
Supplement: c5nr08658b1.pdf [file c5nr08658b1.pdf]

## Vapor and Healing Treatment for $\text{CH}_3\text{NH}_3\text{PbI}_{3-x}\text{Cl}_x$ Films toward Large-Area Perovskite Solar cells.

Laxman Gouda,<sup>†</sup> Ronen Gottesman,<sup>†</sup> Shay Tirosh, Eynav Haltzi, Jiangang Hu, Adam Ginsburg, David Keller, Yaniv Bouhadana and Arie Zaban\*

Department of Chemistry, Center for Nanotechnology & Advanced Materials, Bar Ilan University, Ramat Gan 52900, Israel.

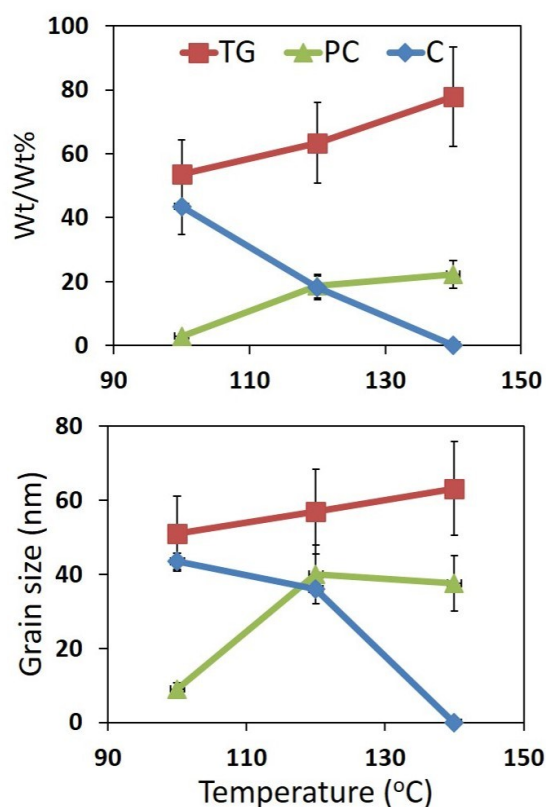

**Figure S1.** Grain size and TG, PC and C perovskite phases wt/wt% growth, calculated from XRD data of perovskite treated with MAI at various temperatures.
